# Supplementary material for: Adaptive evolution of centromere proteins in plants and animals
Source: PubMed Central journal article supplement (PMC549713; doi:10.1186/jbiol11), 2004-08-31
Supplement: jbiol11-s1.pdf [file jbiol11-s1.pdf]

## Additional data file 1

**Table S1**

**Selected *Cenpc* ESTs and genomic sequences from GenBank**

| Organism                         | ESTs                                                                                                                                                                    | Genomic sequences (locus)                                         |
|----------------------------------|-------------------------------------------------------------------------------------------------------------------------------------------------------------------------|-------------------------------------------------------------------|
| Rat                              | CB327827, BQ190551, BG669698                                                                                                                                            | AC095997                                                          |
| Human                            |                                                                                                                                                                         | AC104806, AC109356, AF151723                                      |
| Chimpanzee                       |                                                                                                                                                                         | (From trace archives) <sup>†</sup>                                |
| Dog                              | BU748146, BU748145                                                                                                                                                      |                                                                   |
| Cow                              | CB428746                                                                                                                                                                |                                                                   |
| <i>Schizosaccharomyces pombe</i> |                                                                                                                                                                         | AL023288, AL109834 (SPBC1861.01c)                                 |
| <i>Cryphonectria parasitica</i>  | CB690425                                                                                                                                                                |                                                                   |
| <i>Physcomitrella patens</i>     | BJ167802*, BJ159529*                                                                                                                                                    |                                                                   |
| Poplar                           | B1135594, B1136606, etc.                                                                                                                                                |                                                                   |
| Beet                             | BQ488389*                                                                                                                                                               |                                                                   |
| <i>Arabidopsis thaliana</i>      | AV559306                                                                                                                                                                | AC013453 (Atlg15660)                                              |
| Apple                            | CN489643                                                                                                                                                                |                                                                   |
| Barrel medic                     | BE325476                                                                                                                                                                | AC138580*                                                         |
| Soybean                          | AW780955                                                                                                                                                                |                                                                   |
| Scarlet runner                   | CA902018                                                                                                                                                                |                                                                   |
| Lotus                            | AW720394                                                                                                                                                                |                                                                   |
| Zinnia                           | AU290185                                                                                                                                                                |                                                                   |
| Sunflower                        | BQ916764*                                                                                                                                                               |                                                                   |
| Lettuce                          | BQ996789, BQ999967*                                                                                                                                                     |                                                                   |
| Potato                           | BF054220, BQ115396, BE343178, BQ509271                                                                                                                                  |                                                                   |
| Tomato                           | AI485238, AI771307, AI484910, AW622731, BI925195                                                                                                                        |                                                                   |
| Maize                            | AW062057, AY109432, etc.                                                                                                                                                | BH215393, BZ803155, CC445929, CC605630, CG179177, CG008398*, etc. |
| <i>Sorghum bicolor</i>           | BG355465*, BG355791*, CF072297, CD228196*, CD228224*                                                                                                                    | CL157864, CL193099, CL193100                                      |
| <i>Sorghum propinquum</i>        | BF421310                                                                                                                                                                |                                                                   |
| Sugarcane                        | CA256451, CA169588, CA083292, CA122448, CA065654, CA294311, CA079147, CA148005, CA191044, CA138332, CA098410, CA294240, CA256540, CA065728, CA122508, CA16966, BQ533265 |                                                                   |
| Rice                             | CB000111, C27347                                                                                                                                                        | AP002897 (P0686E09.20)                                            |
| Barley                           | BU992050, BU998115*, CA026000 BM098142, AJ474427                                                                                                                        |                                                                   |
| Wheat                            | BQ280552, AL820601*, CA658451, CA741440, BJ303473, BJ309345, BJ302979, BJ308833, BJ302988, BJ308841, BJ277765, BJ282957                                                 |                                                                   |

\*Probable pseudogene or improperly spliced; <sup>†</sup>the chimpanzee *Cenpc* gene structure was predicted by alignment with the human, mouse, and rat genes, including alignment of intron positions [29]. Chimpanzee *Cenpc* may differ at the beginning of exon 5, where a G/C transversion may necessitate the use of a splice acceptor sequence (actgcag<sup>^</sup>AAA) that is two codons downstream from the site used in human *Cenpc* (ag<sup>^</sup>TGC CAG AAA).
