# Supplementary material for: Adaptive evolution of centromere proteins in plants and animals
Source: PubMed Central journal article supplement (PMC549713; doi:10.1186/jbiol11), 2004-08-31
Supplement: jbiol11-s2.pdf [file jbiol11-s2.pdf]

## Additional data file 2

Table S2

**Cenpc cDNAs and amplified genomic sequences**

| Organism                  | cDNAs or Genomic Amplicon     | Accession | Source                  |
|---------------------------|-------------------------------|-----------|-------------------------|
| Rat                       | UI-R-FS0-crt-p-12-0-UI        | AY693786  | [78]                    |
|                           | UI-R-DQI-ckv-e-04-0-UI        | AY693787  | [78]                    |
|                           | <b>DRNAAIB08</b>              | AY693788  | [79]                    |
| Cow                       | FQY8021 Row:G Col:8           | AY693782  | [80]                    |
| <i>A. thaliana</i>        | <b>CenpcColl</b>              | AY693798  | [64]                    |
| <i>A. arenosa</i>         | <b>CenpcCareI</b>             | AY693778  | [64]                    |
| Barrel medic              | <b>NF089E04ST</b>             | AY693784  | [81]                    |
| Soybean                   | Gm-cl037-952                  | AY693794  | [82]                    |
| Beet                      | <b>L-11-3*</b>                | AY693781  | Bernd Weisshaar         |
| Potato                    | cSTB39G13*                    | AY693785  | [83]                    |
| Tomato                    | cTOB4K16                      | AY693799  | [84]                    |
| Sugarcane                 | <b>SCBFAD1047C06 (Cenpc1)</b> | AY693795  | [85]                    |
|                           | <b>SCEQRT2025C08 (Cenpc2)</b> | AY693796  | [85]                    |
|                           | <b>SCEZRZ1015G07 (Cenpc1)</b> | AY693797  | [85]                    |
| <i>Sorghum bicolor</i>    | <b>EMI_16_G07_A002*</b>       | AY693791  | [86]                    |
|                           | <b>FEI_7_B02_A002</b>         | AY693792  | [86]                    |
|                           | CCC1_6_F09_A007*              | AY693790  | [86]                    |
| <i>Sorghum propinquum</i> | <b>FMI_7_B04_A003</b>         | AY693793  | [86]                    |
| Rice                      | S345W-D05                     | AY693789  | Benildo G. de los Reyes |
|                           | C51663_1A                     | AY693783  | [87]                    |
| Barley                    | exons 9p-10p                  | AY693780  | Andreas Houben          |
|                           | exons 9q-10q                  | AY693779  | Andreas Houben          |
| Wheat                     | WHE3002_C07_E14               | AY693800  | [88]                    |
|                           | C05_O232_plate_15*            | AY693801  | [89]                    |
|                           | exons 9p-10p                  | AY693802  | Andreas Houben          |
|                           | exons 9q-10q                  | AY693803  | Andreas Houben          |

\*Probable pseudogene or improperly spliced; **bold**, full-length cDNA.
