# Supplementary material for: Adaptive evolution of centromere proteins in plants and animals
Source: PubMed Central journal article supplement (PMC549713; doi:10.1186/jbiol11), 2004-08-31
Supplement: jbiol11-s3.pdf [file jbiol11-s3.pdf]

**Additional figure**

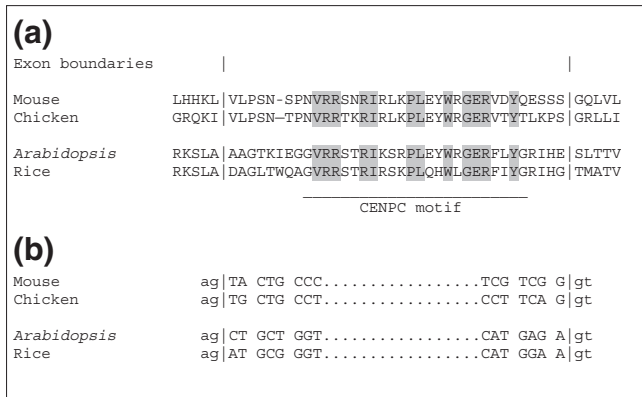

**Figure S1**  
 Conservation of the exon containing the CENPC motif. **(a)** Alignment of amino-acid sequences encoded by exons containing the CENPC motif in mouse, chicken, *Arabidopsis*, and rice. **(b)** The flanking splice junctions are positioned in the +1 reading frame.
